# Supplementary material
Source: PubMed Central journal article supplement (PMC6115652)
Supplement: ASN.2018010090SupplementaryData1.pdf [file ASN.2018010090SupplementaryData1.pdf]

## SUPPLEMENTAL MATERIAL

### Supplemental Figure number: 6

Supplemental Figure 1. Gender-stratified smooth curves of SCr with respect to age in the study population.

Supplemental Figure 2. Density plot of serum creatinine in different age strata.

Supplemental Figure 3. Histograms of serum creatinine in different age strata.

Supplemental Figure 4. Density plot of log creatinine ratio in different strata of age and initial creatinine level.

Supplemental Figure 5. Quantile-quantile plot of log creatinine ratio in different strata of age and initial creatinine level.

Supplemental Figure 6. Kaplan-Meier curves of cumulative death hazard by different AKI definitions.

### Supplemental table number: 8

**Supplemental Table 1. The SCr criteria for diagnosis of AKI in children.**

Supplemental Table 2. Incidences of AKI during the 7-day AKI screening window.

**Supplemental Table 3. Incidence of AKI stratified by the components of the KDIGO SCr criteria**

Supplemental Table 4. Performance of predictive models for time to death incorporating different AKI definitions.

**Supplemental Table 5. Death risk stratified by the status and severity of different AKI definitions**

Supplemental Table 6. Performance of predictive models for risk of death by fixed time points incorporating different AKI definitions in patients with and without intensive care.

Supplemental Table 7. Association of AKI by different definitions with length of stay and average daily cost during hospitalization.

Supplemental Table 8. Association of pROCK-defined AKI with progression to CKD within 1 year.

**Supplemental Figure 1. Gender-stratified smooth curves of SCr with respect to age in the study population.** Only the first SCr value from each patient was used to derive the smoothed curves. An equation for the age- and gender- specific SCr reference was derived by 2-segment linear regression (the dotted lines) as:  $SCr = 5 * age - 16$  in boys when  $age > 13$  years;  $2 * age + 21$  otherwise; where SCr is in unit of  $\mu\text{mol/L}$ , and age is in unit of year.

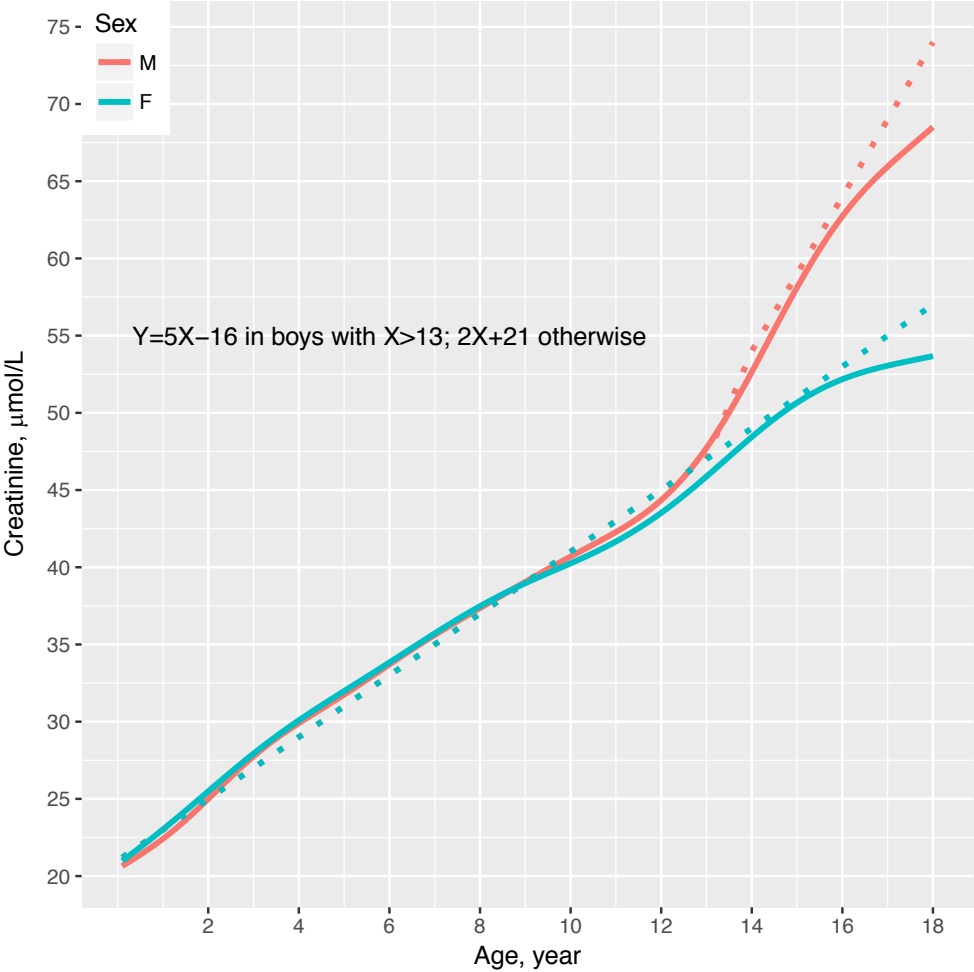

**Supplemental Figure 2. Density plots of serum creatinine in different age strata.** Age were divided into 4 strata: 1mo. To 1 year, >1 to 5 years, >5 to 10 years, and >10 to 18 years.

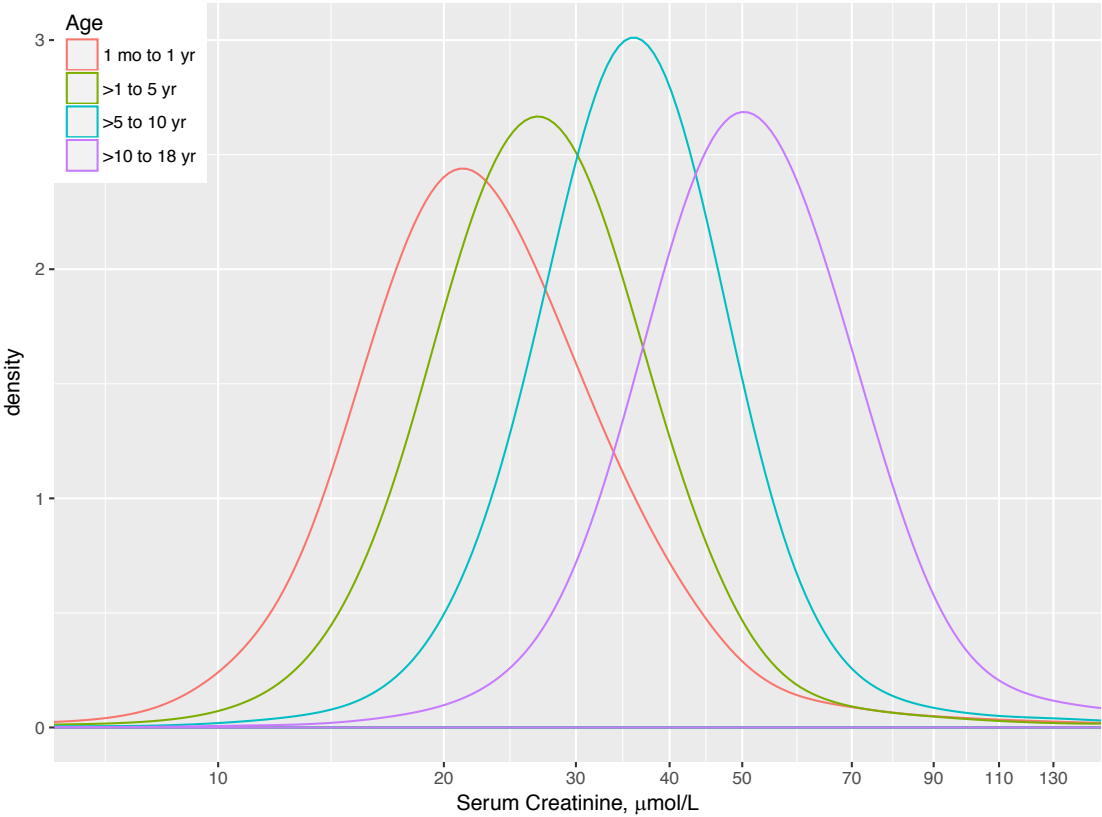

**Supplemental Figure 3. Histograms of serum creatinine in different age strata.** The red lines are the probability density curves of the estimated log-normal distributions of serum creatinine.

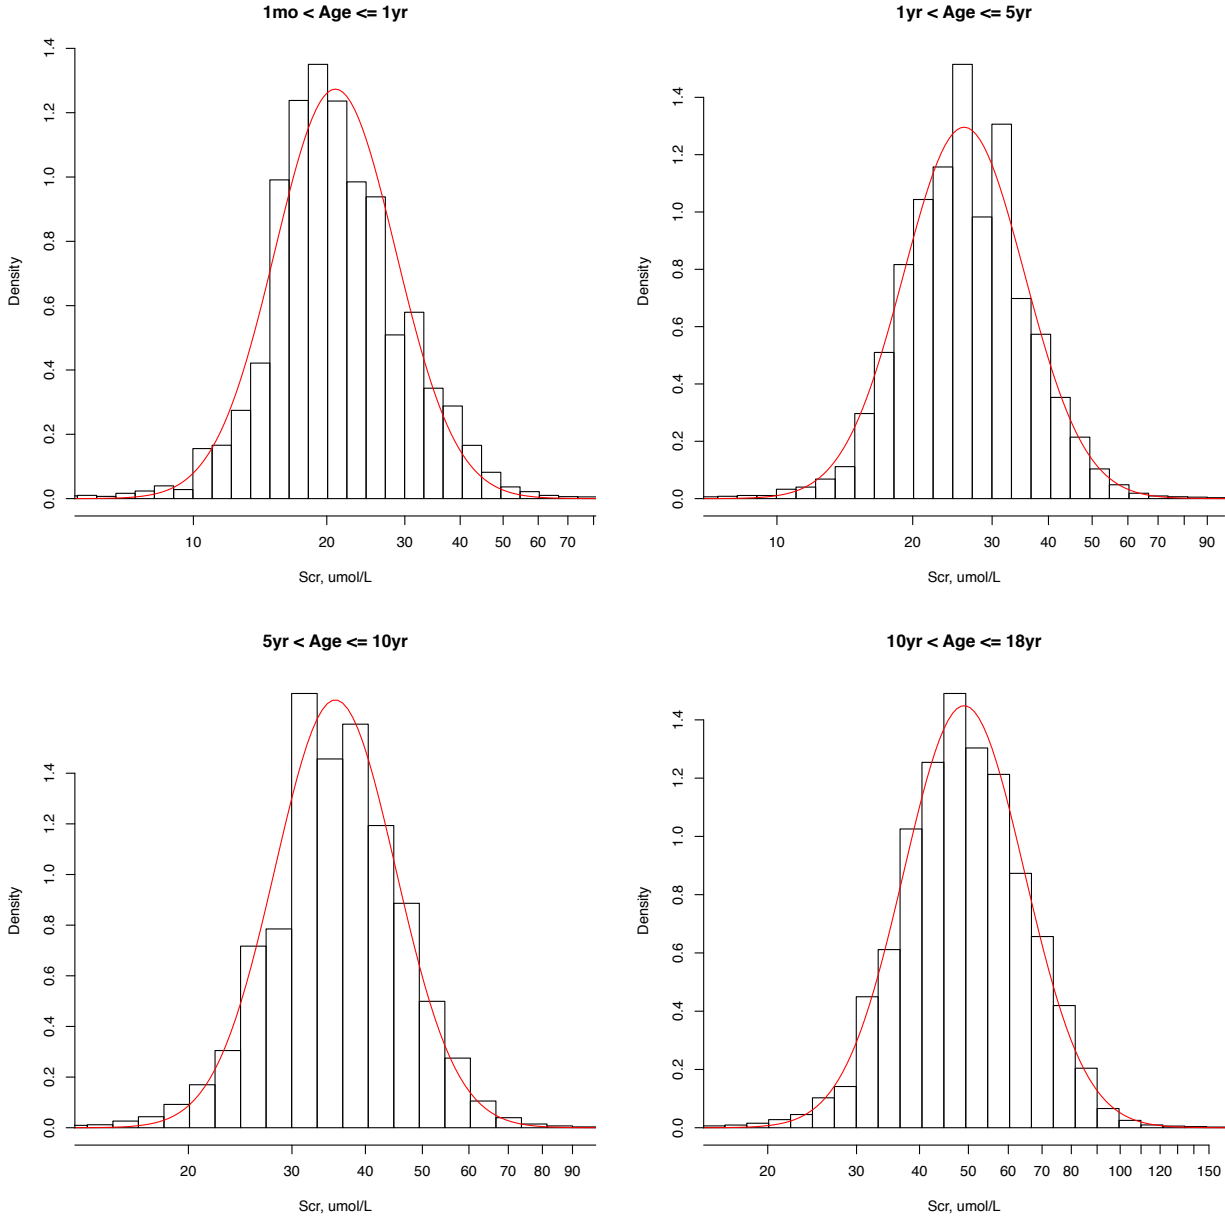

**Supplemental Figure 4. Density plots of log creatinine ratios in different strata of age and initial creatinine level.**

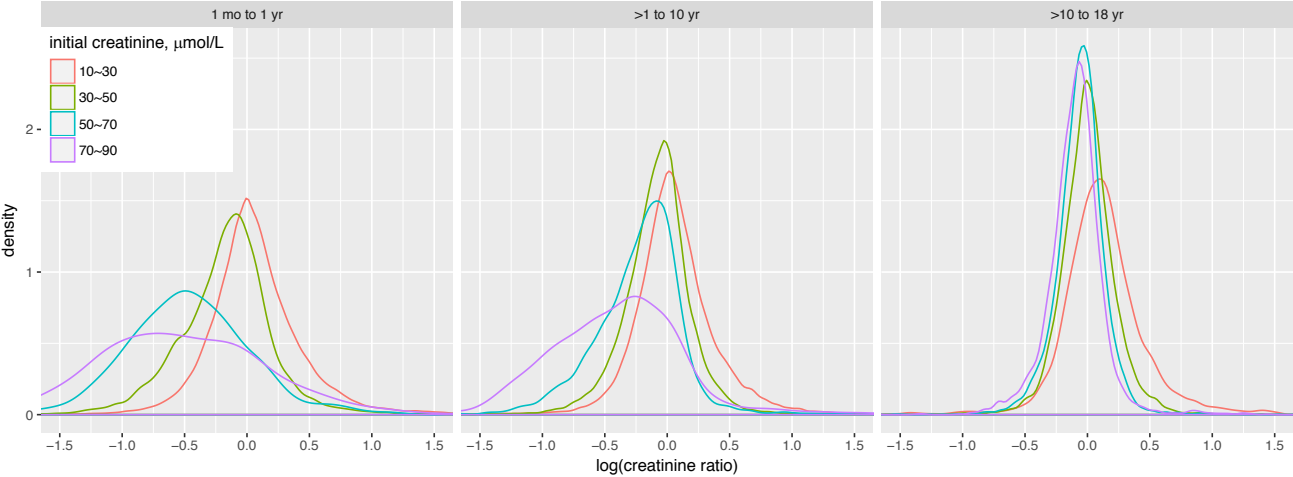

**Supplemental Figure 5. Quantile-quantile plots of log creatinine ratios in different strata of age and initial creatinine level.** The initial creatinine level from 10 to 70  $\mu\text{mol/L}$  is divided into 6 strata and shown in the 6 subpanels. The vertical dotted line indicates the 95<sup>th</sup> percentile under normal distribution. Age were divided into 4 strata: 1mo. To 1 year, >1 to 5 years, >5 to 10 years, and >10 to 18 years.

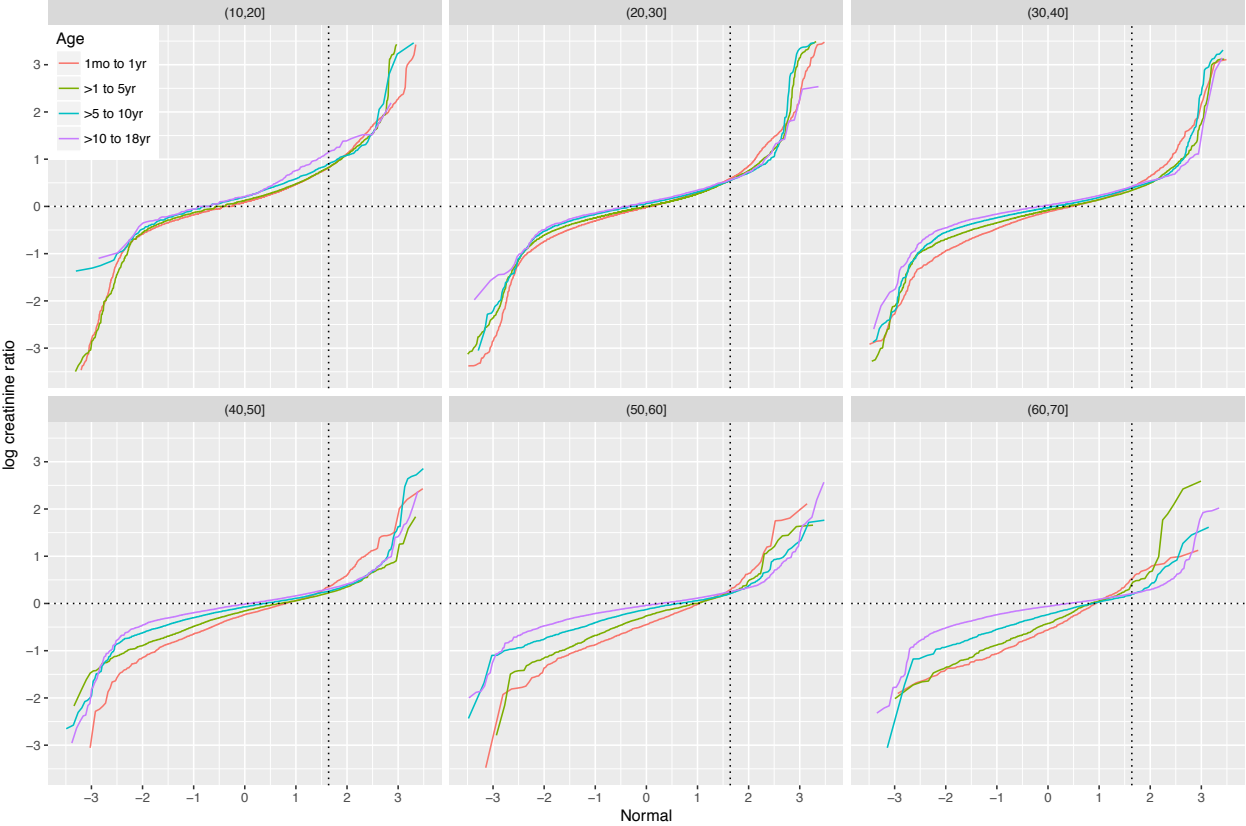

**Supplemental Figure 6. Kaplan-Meier curves of cumulative death hazard by different AKI definitions.** The curves of KDIGO-/pROCK+ (n=266) and pRIFLE-/pROCK+ (n=34) strata are not plotted due to limited size of these two strata.

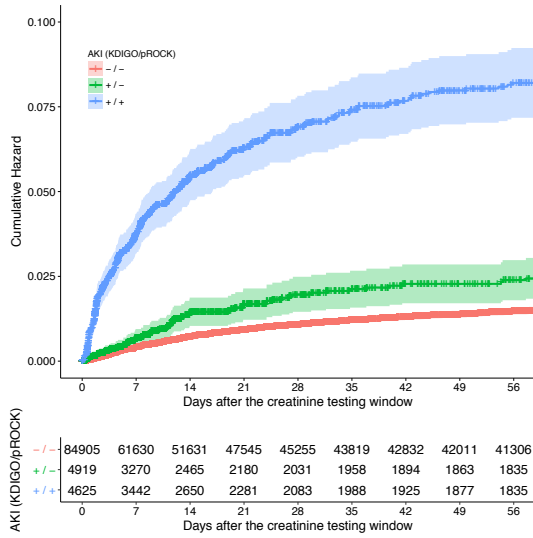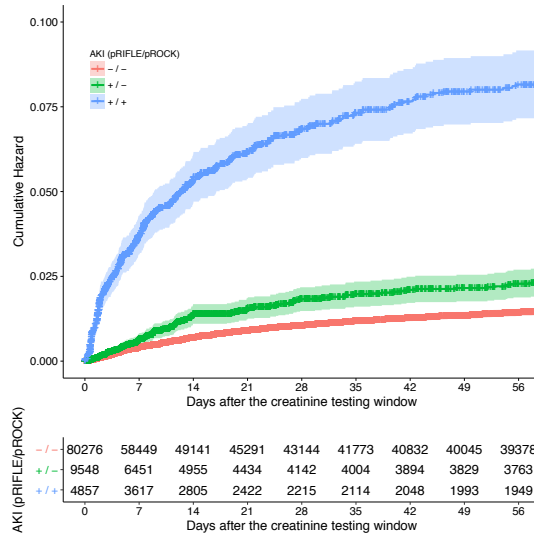

**Supplemental Table 1. The SCr criteria for diagnosis of AKI in children**

| <b>Definition</b> | <b>Diagnosis</b>                                                                                       | <b>Staging</b>                                                                                                                                                                                                                  |
|-------------------|--------------------------------------------------------------------------------------------------------|---------------------------------------------------------------------------------------------------------------------------------------------------------------------------------------------------------------------------------|
| KDIGO             | SCr increase of $\geq 26.5$ $\mu\text{mol/L}$ (0.3mg/dL) within 48 hours; or $\geq 50\%$ within 7 days | Stage 1: SCr increase $< 100\%$<br>Stage 2: $100\% \leq$ SCr increase $< 200\%$<br>Stage 3: SCr increase $\geq 200\%$                                                                                                           |
| pRIFLE*           | SCr increase of $\geq 33\%$ within 7 days                                                              | Stage 1: SCr increase $< 100\%$<br>Stage 2: $100\% \leq$ SCr increase $< 300\%$<br>Stage 3: SCr increase $\geq 300\%$                                                                                                           |
| pROCK             | SCr increase of both $\geq 30\%$ and $\geq 20$ $\mu\text{mol/L}$ within 7 days                         | Stage 1: SCr increase $< 60\%$ and $40$ $\mu\text{mol/L}$<br>Stage 2: $60\%$ and $40$ $\mu\text{mol/L} \leq$ SCr increase $< 120\%$ and $80$ $\mu\text{mol/L}$<br>Stage 3: SCr increase $\geq 120\%$ and $80$ $\mu\text{mol/L}$ |

\* SCr increase of 33%, 100%, 300% in children is equivalent to CrCl decrease of 25%, 50%, and 75%, respectively, according to the SCr-based Schwartz equation.



**Supplemental Table 2. Incidences of AKI during the 7-day AKI screening window**

| <b>pROCK</b>    | <b>KDIGO</b> |        | <b>pRIFLE</b> |        | <b>Subtotal</b> |
|-----------------|--------------|--------|---------------|--------|-----------------|
|                 | -            | +      | -             | +      |                 |
| -               | 92,089       | 5,296  | 87,134        | 10,251 | 97,385          |
| +               | 282          | 5,150  | 36            | 5,396  | 5,432           |
| <b>Subtotal</b> | 92,371       | 10,446 | 87,170        | 15,647 | 102,817         |

**Supplemental Table 3. Incidence of AKI stratified by the components of the KDIGO SCr criteria**

| <b>KDIGO<br/>definition*</b> | <b>pROCK definition</b> |              |
|------------------------------|-------------------------|--------------|
|                              | <b>Non-AKI</b>          | <b>AKI</b>   |
| <b>Non-AKI</b>               | 92,089 (99.7%)          | 282 (0.3%)   |
| <b>KDIGO-1 AKI</b>           | 14 (1.3%)               | 987 (98.7%)  |
| <b>KDIGO-2 AKI</b>           | 5282 (55.9%)            | 4163 (44.1%) |

\*KDIGO-1 AKI: SCr increase  $\geq 26.5$   $\mu\text{mol/L}$  (0.3 mg/dl) over the baseline within 48 hours.

KDIGO-2 AKI: SCr increase  $\geq 50\%$  over the baseline within 7 days, but the increase does not meet the KDIGO-1 criterion or does not have SCr measurements within 48 hours.

**Supplemental Table 4. Performance of predictive models for time to death incorporating different AKI definitions.**

| <b>Criteria</b>                        | <b>HR (95% CI)<sup>a</sup></b> | <b>AIC<sup>b</sup></b> | <b>c-index</b> | <b>P value<sup>c</sup></b> |
|----------------------------------------|--------------------------------|------------------------|----------------|----------------------------|
| <b>All patients</b>                    |                                |                        |                |                            |
| pROCK                                  | 3.57 (3.15, 4.04)              | -                      | 0.678          | -                          |
| KDIGO                                  | 2.57 (2.28, 2.90)              | 108.1                  | 0.670          | 0.002                      |
| pRIFLE                                 | 2.22 (1.99, 2.48)              | 133.6                  | 0.669          | 0.009                      |
| <b>Patients with intensive care</b>    |                                |                        |                |                            |
| pROCK                                  | 4.15 (3.40, 5.06)              | -                      | 0.677          | -                          |
| KDIGO                                  | 2.52 (2.06, 3.09)              | 80.3                   | 0.653          | <0.001                     |
| pRIFLE                                 | 2.32 (1.92, 2.81)              | 82.0                   | 0.651          | <0.001                     |
| <b>Patients without intensive care</b> |                                |                        |                |                            |
| pROCK                                  | 3.29 (2.80, 3.87)              | -                      | 0.637          | -                          |
| KDIGO                                  | 2.68 (2.30, 3.11)              | 24.9                   | 0.628          | 0.05                       |
| pRIFLE                                 | 2.24 (1.95, 2.57)              | 47.5                   | 0.630          | 0.23                       |

<sup>a</sup> Cox proportional hazard models with AKI status, age, sex, initial creatinine value, and need for intensive care as predictors.

<sup>b</sup> AIC: Akaike information criterion; with pROCK as reference.

<sup>c</sup> P value was from the test comparing the c-index with that of pROCK.

**Supplemental Table 5. Death risk stratified by the status and severity of different AKI definitions**

| pROCK   | KDIGO                 | pRIFLE     | Total, N | Dead, N | Person year | Death rate <sup>a</sup> | HR (95% CI)       |
|---------|-----------------------|------------|----------|---------|-------------|-------------------------|-------------------|
| non-AKI | non-AKI               |            | 84,905   | 1,453   | 46,834      | 3,102                   | -                 |
| non-AKI | mild AKI <sup>#</sup> |            | 4,052    | 81      | 1,831       | 4,424                   | 1.25 (0.99-1.58)  |
| non-AKI | severe AKI            |            | 867      | 10      | 357         | 2,800                   | 0.65 (0.33-1.26)  |
| AKI     | non-AKI               |            | 266      | 15      | 161         | 9,341                   | 2.36 (1.41-3.96)  |
| AKI     | mild AKI              |            | 1,386    | 76      | 689         | 11,026                  | 2.69 (2.13-3.40)  |
| AKI     | severe AKI            |            | 3,239    | 220     | 1508        | 14,589                  | 4.22 (3.65 -4.89) |
| non-AKI |                       | non-AKI    | 80,276   | 1,365   | 44,679      | 3,055                   | -                 |
| non-AKI |                       | mild AKI   | 8,681    | 169     | 3,986       | 4,240                   | 1.26 (1.06-1.49)  |
| non-AKI |                       | severe AKI | 867      | 10      | 357         | 2,800                   | 0.67 (0.34-1.30)  |
| AKI     |                       | non-AKI    | 34       | 1       | 27          | *                       | *                 |
| AKI     |                       | mild AKI   | 1,681    | 90      | 823         | 10,938                  | 2.71 (2.19-3.37)  |
| AKI     |                       | severe AKI | 3,239    | 220     | 1508        | 14,589                  | 4.29 (3.70 -4.97) |

<sup>#</sup>Mild AKI is defined as stage 1 AKI, severe AKI is defined as stage 2 or 3 AKI.

\*Do to calculate due to limited observations.

**Supplemental Table 6. Performance of predictive models for risk of death by fixed time points incorporating different AKI definitions in patients with and without intensive care**

| Definition                                    | OR <sup>a</sup> | 95% CI of OR | AIC <sup>b</sup> | AUC   | P difference in AUC | Sensitivity <sup>c</sup> | 95% CI for sensitivity | P difference in sensitivity |
|-----------------------------------------------|-----------------|--------------|------------------|-------|---------------------|--------------------------|------------------------|-----------------------------|
| <b>With Intensive Care</b>                    |                 |              |                  |       |                     |                          |                        |                             |
| <b>Day 15, 9,556 survivors and 290 death</b>  |                 |              |                  |       |                     |                          |                        |                             |
| pROCK                                         | 5.88            | 4.50, 7.70   | -                | 0.709 | -                   | 29.3%                    | 24.1%, 34.8%           | -                           |
| KDIGO                                         | 3.56            | 2.71, 4.68   | 59.0             | 0.675 | <0.001              | 25.5%                    | 20.7%, 31.0%           | 0.04                        |
| pRIFLE                                        | 3.26            | 2.51, 4.24   | 59.5             | 0.686 | 0.04                | 24.8%                    | 20.0%, 30.0%           | 0.03                        |
| <b>Day 30, 8,266 survivors and 373 death</b>  |                 |              |                  |       |                     |                          |                        |                             |
| pROCK                                         | 5.83            | 4.55, 7.45   | -                | 0.704 | -                   | 28.2%                    | 23.6%, 32.7%           | -                           |
| KDIGO                                         | 3.41            | 2.66, 4.36   | 73.4             | 0.682 | 0.006               | 23.9%                    | 19.6%, 28.7%           | 0.04                        |
| pRIFLE                                        | 3.05            | 2.41, 3.86   | 78.2             | 0.683 | 0.02                | 24.1%                    | 19.8%, 29.0%           | 0.07                        |
| <b>Day 60, 7,453 survivors and 434 death</b>  |                 |              |                  |       |                     |                          |                        |                             |
| pROCK                                         | 5.50            | 4.33, 6.99   | -                | 0.720 | -                   | 26.3%                    | 21.9%, 31.1%           | -                           |
| KDIGO                                         | 3.08            | 2.43, 3.89   | 81.9             | 0.688 | <0.001              | 21.4%                    | 17.7%, 25.1%           | 0.01                        |
| pRIFLE                                        | 2.72            | 2.18, 3.39   | 88.4             | 0.686 | <0.001              | 22.4%                    | 18.2%, 26.5%           | 0.04                        |
| <b>Day 90, 7073 survivors and 455 death</b>   |                 |              |                  |       |                     |                          |                        |                             |
| pROCK                                         | 5.33            | 4.20, 6.76   | -                | 0.711 | -                   | 25.5%                    | 20.9%, 30.1%           | -                           |
| KDIGO                                         | 2.90            | 2.30, 3.66   | 84.9             | 0.677 | <0.001              | 22.0%                    | 18.2%, 26.2%           | 0.08                        |
| pRIFLE                                        | 2.53            | 2.03, 3.15   | 93.4             | 0.675 | <0.001              | 22.4%                    | 18.5%, 26.6%           | 0.16                        |
| <b>Without Intensive Care</b>                 |                 |              |                  |       |                     |                          |                        |                             |
| <b>Day 15, 45,301 survivors and 475 death</b> |                 |              |                  |       |                     |                          |                        |                             |
| pROCK                                         | 7.29            | 5.91, 8.98   | -                | 0.721 | -                   | 30.7%                    | 26.5%, 34.9%           | -                           |
| KDIGO                                         | 6.07            | 4.97, 7.42   | 9.1              | 0.716 | 0.32                | 28.2%                    | 24.2%, 32.4%           | 0.25                        |
| pRIFLE                                        | 5.13            | 4.22, 6.22   | 20.6             | 0.721 | 0.99                | 28.0%                    | 24.0%, 32.2%           | 0.22                        |
| <b>Day 30, 39,828 survivors and 612 death</b> |                 |              |                  |       |                     |                          |                        |                             |
| pROCK                                         | 6.40            | 5.26, 7.80   | -                | 0.713 | -                   | 27.5%                    | 24.0%, 30.9%           | -                           |
| KDIGO                                         | 5.26            | 4.36, 6.35   | 10.6             | 0.706 | 0.12                | 26.8%                    | 23.5%, 30.4%           | 0.65                        |
| pRIFLE                                        | 4.33            | 3.62, 5.18   | 31.3             | 0.707 | 0.25                | 26.6%                    | 23.0%, 30.1%           | 0.59                        |
| <b>Day 60, 36,582 survivors and 748 death</b> |                 |              |                  |       |                     |                          |                        |                             |
| pROCK                                         | 5.72            | 4.75, 6.90   | -                | 0.693 | -                   | 24.7%                    | 21.7%, 27.7%           | -                           |
| KDIGO                                         | 4.68            | 3.92, 5.58   | 12.6             | 0.687 | 0.18                | 24.1%                    | 21.1%, 27.4%           | 0.52                        |
| pRIFLE                                        | 3.88            | 3.29, 4.59   | 31.2             | 0.689 | 0.45                | 23.8%                    | 20.7%, 26.9%           | 0.52                        |

**Day 90, 34,661 survivors and 840 death**

|        |      |            |      |       |      |       |              |      |
|--------|------|------------|------|-------|------|-------|--------------|------|
| pROCK  | 5.15 | 4.29, 6.19 | -    | 0.684 | -    | 22.4% | 20.0%, 25.2% | -    |
| KDIGO  | 4.20 | 3.53, 4.98 | 14.0 | 0.680 | 0.19 | 22.5% | 19.6%, 25.7% | 0.92 |
| pRIFLE | 3.50 | 2.98, 4.11 | 31.2 | 0.681 | 0.50 | 21.3% | 18.5%, 23.9% | 0.30 |

<sup>a</sup> logistic models with AKI status, age, sex, initial creatinine value, and need for intensive care as predictors.

<sup>b</sup> AIC: Akaike information criterion; with pROCK as reference.

<sup>c</sup> sensitivity given a specificity of 0.95.

**Supplemental Table 7. Association of AKI by different definitions with length of stay and average daily cost during hospitalization.**

| pROCK | KDIGO | pRIFLE | Length of stay (day) |                     |                      | Average daily cost (yuan) |                      |                      |
|-------|-------|--------|----------------------|---------------------|----------------------|---------------------------|----------------------|----------------------|
|       |       |        | N                    | Median<br>(q25,q75) | Ratio*<br>(95% CI)   | N                         | Median<br>(q25,q75)  | Ratio*<br>(95% CI)   |
| -     | -     |        | 91,312               | 14<br>(10, 22)      | -                    | 77,672                    | 1480<br>(876, 2541)  | -                    |
| -     | +     |        | 5,207                | 14<br>(10, 20)      | 0.97<br>(0.96, 0.99) | 4,634                     | 2311<br>(1166, 3613) | 1.10<br>(1.08, 1.11) |
| +     | -     |        | 271                  | 15<br>(10.5, 25)    | 1.04<br>(0.97, 1.11) | 246                       | 1750<br>(1019, 3282) | 1.08<br>(1.01, 1.15) |
| +     | +     |        | 4,722                | 17<br>(12, 26)      | 1.09<br>(1.07, 1.11) | 3,871                     | 2838<br>(1523, 4188) | 1.23<br>(1.21, 1.25) |
| -     |       | -      | 86,425               | 14<br>(9, 22)       | -                    | 73,444                    | 1463<br>(870, 2497)  | -                    |
| -     |       | +      | 10,094               | 14<br>(10, 20)      | 0.98<br>(0.97, 0.99) | 8,862                     | 2105<br>(1091, 3442) | 1.09<br>(1.07, 1.10) |
| +     |       | -      | 35                   | 16<br>(13, 24.5)    | 1.06<br>(0.88, 1.28) | 28                        | 1514<br>(730, 4218)  | 0.99<br>(0.81, 1.19) |
| +     |       | +      | 4,958                | 17<br>(12, 26)      | 1.08<br>(1.06, 1.10) | 4,089                     | 2779<br>(1463, 4156) | 1.23<br>(1.21, 1.25) |

\* Ratios were calculated using -/- (pROCK/KDIGO or pROCK/pRIFLE) as the reference. The effects of AKI by different definitions on log-transformed length of stay (LOS) and average cost were analyzed in regression models with adjustment for age, gender, need for intensive care, comorbidities, and medical center. 1301 patients died during hospitalization were excluded in the LOS analysis. 16,392 patients with missing hospitalization cost were excluded in the cost analysis.

**Supplemental Table 8. Association of pROCK-defined AKI with progression to CKD within 1 year<sup>a</sup>**

| <b>AKI Status</b> | <b>N</b> | <b>CKD<sup>b</sup></b> | <b>Rate</b> | <b>OR<sup>c</sup></b> | <b>95% CI<sup>c</sup></b> |
|-------------------|----------|------------------------|-------------|-----------------------|---------------------------|
| <b>No</b>         | 4,398    | 19                     | 0.43%       | -                     | -                         |
| <b>yes</b>        | 193      | 6                      | 3.11%       | 7.56                  | 2.95, 19.41               |

<sup>a</sup> The analysis included a total of 4,591 patients whose baseline SCr was <1.5 times of age- and sex-specific reference of SCr (see Supplemental Figure 1) and had multiple SCr measurements till one year after the 7-day screening window (so the status of progression to CKD by 1 year could be determined).

<sup>b</sup> Progression to CKD was defined as an increase in SCr of  $\geq 20$   $\mu\text{mol/L}$  and 30% from the baseline, and to a level of  $\geq 1.5$  times of the age- and sex-specific reference of SCr, lasting for at least 90 days.

<sup>c</sup> Logistic model with adjustment for age, gender, baseline SCr, and need for intensive care.
